# Supplementary material
Source: publisher figshare collection journal article supplement (https://tandf.figshare.com/articles/dataset/_/20464696)

## Electronic Supplement

Journal of Vertebrate Paleontology

The sauropod from the Lower Jurassic La Quinta Formation (Dept. Cesar, Colombia) and the  
initial diversification of eusauropods at low latitudes

ALDO F. RINCÓN,<sup>1</sup> DANIEL A. RAAD PÁJARO,<sup>1</sup> HAROLD F. JIMÉNEZ VELANDIA,<sup>2,†</sup>  
MARTÍN D. EZCURRA,<sup>3</sup> and JEFFREY A. WILSON MANTILLA<sup>\*,4</sup>

<sup>1</sup>Departamento de Física y Geociencias, Universidad del Norte, Barranquilla, Colombia,  
alrincon@uninorte.edu.co, daraad@uninorte.edu.co;

<sup>2</sup>Departamento de Geología, Universidad EAFIT, Medellín, Colombia,  
hjimene3.geo@gmail.com;

<sup>3</sup>Sección Paleontología de Vertebrados, CONICET-Museo Argentino de Ciencias Naturales  
“Bernardino Rivadavia,” Avenida Ángel Gallardo 470, C1405DJR, Buenos Aires, Argentina,  
martindezcurra@yahoo.com.ar;

<sup>4</sup>Museum of Paleontology and Department of Earth & Environmental Sciences, University of  
Michigan, Ann Arbor, Michigan, 48109-1085, U.S.A., [wilsonja@umich.edu](mailto:wilsonja@umich.edu)

---

<sup>†</sup> Current Address: Departamento de Ciencias Geológicas, Universidad de Caldas, Manizales, Colombia

<sup>\*</sup> Corresponding Author

## CONTENTS

Photographs of *Perijasaurus lapaz* nov. gen. et nov. sp. (UCMP 37689).

Specimen is a dorsal vertebra consisting of three parts: (1) partial neural arch; (2) right diapophysis; and (3) centrum and partial neural arch.

Photographs on pages 3–20:

1. partial neural arch, anterior
2. partial neural arch, dorsal
3. partial neural arch, left lateral
4. partial neural arch, posterior
5. partial neural arch, right lateral
6. partial neural arch, ventral
  
7. right diapophysis, anterior
8. right diapophysis, distal
9. right diapophysis, dorsal
10. right diapophysis, posterior
11. right diapophysis, proximal
12. right diapophysis, ventral
  
13. centrum/partial neural arch, anterior
14. centrum/partial neural arch, dorsal
15. centrum/partial neural arch, left lateral
16. centrum/partial neural arch, posterior
17. centrum/partial neural arch, right lateral
18. centrum/partial neural arch, ventral

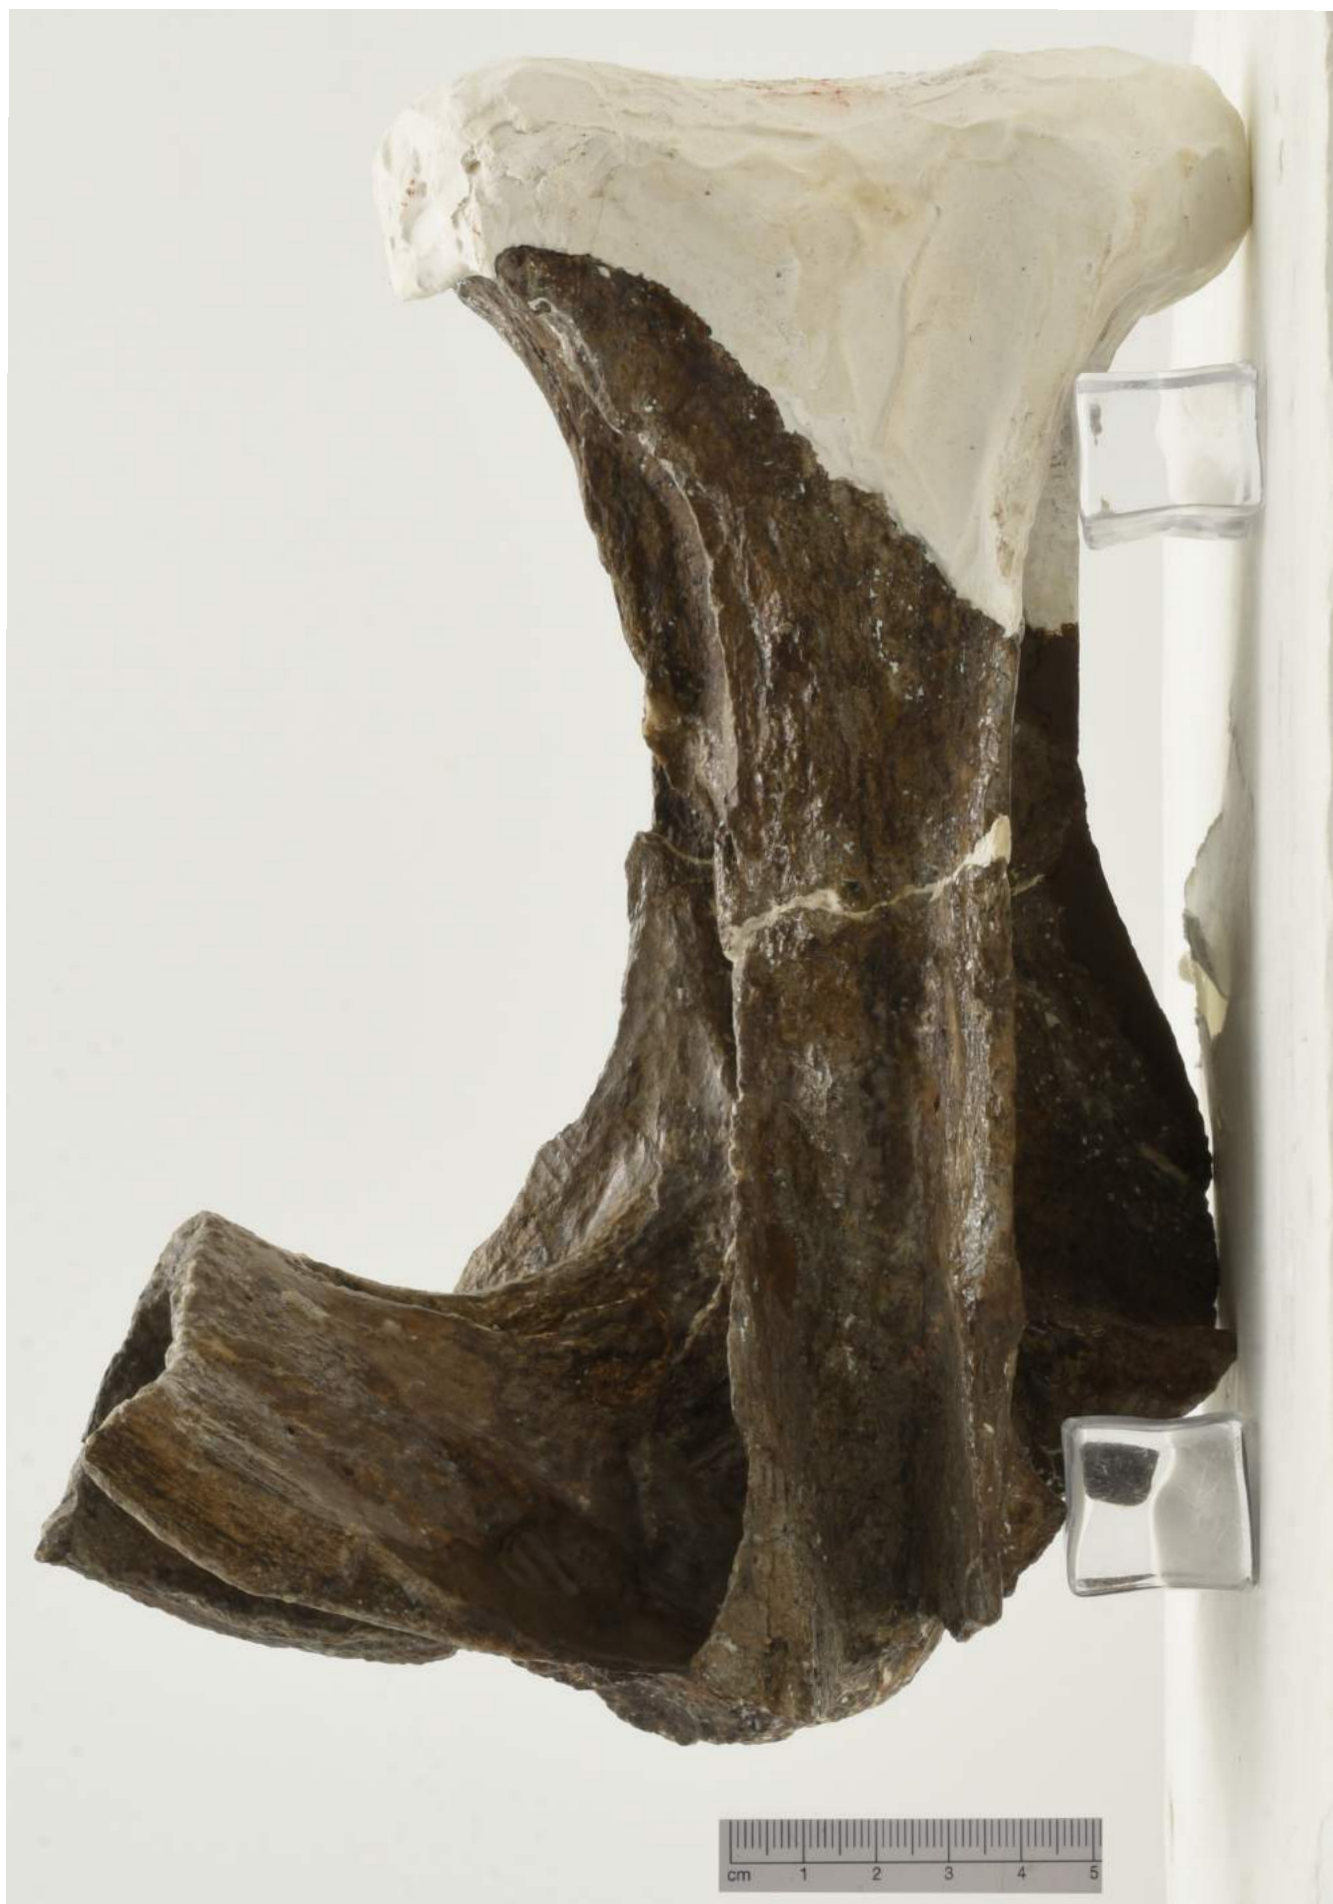

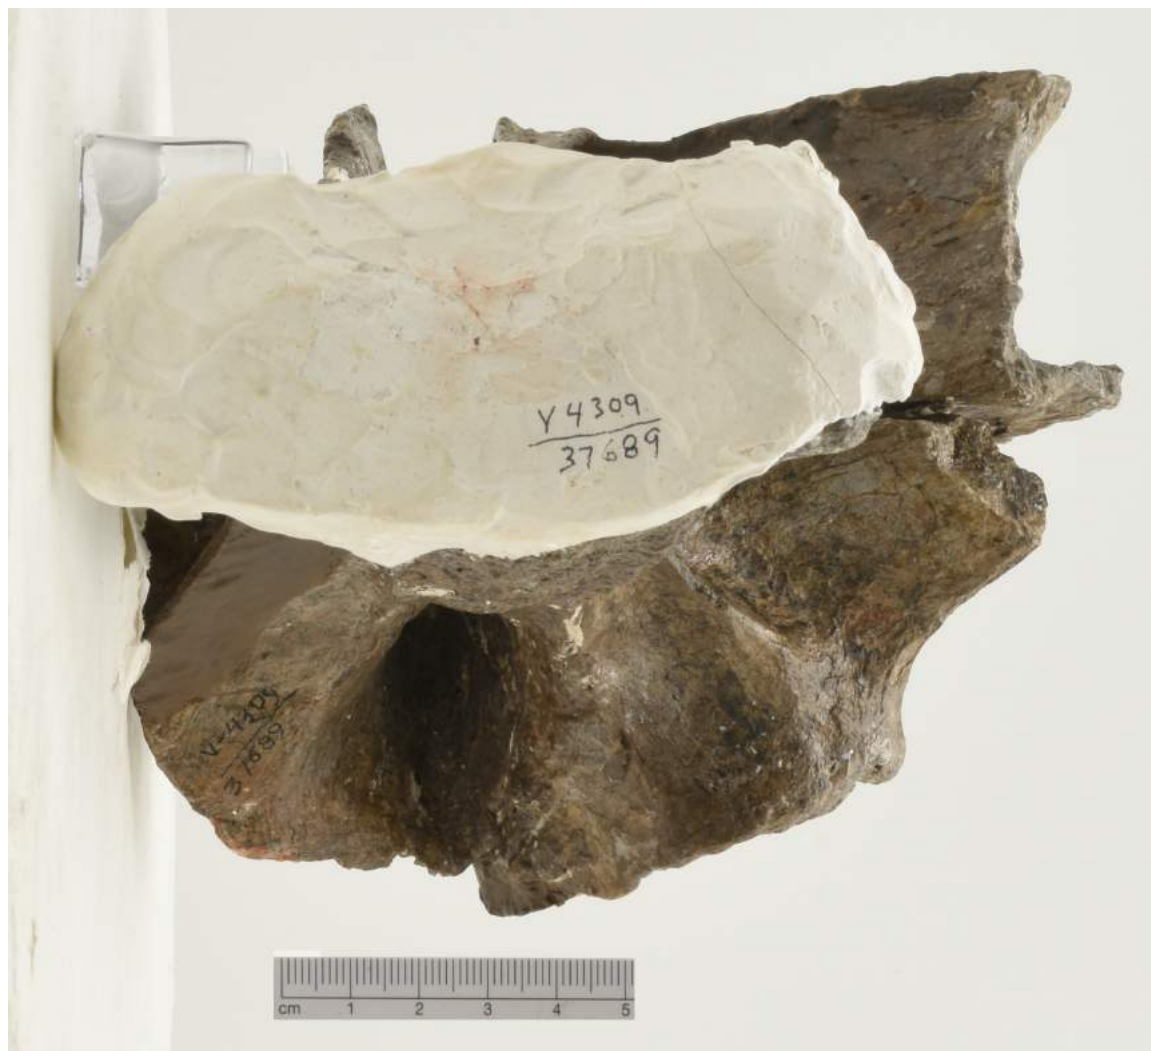

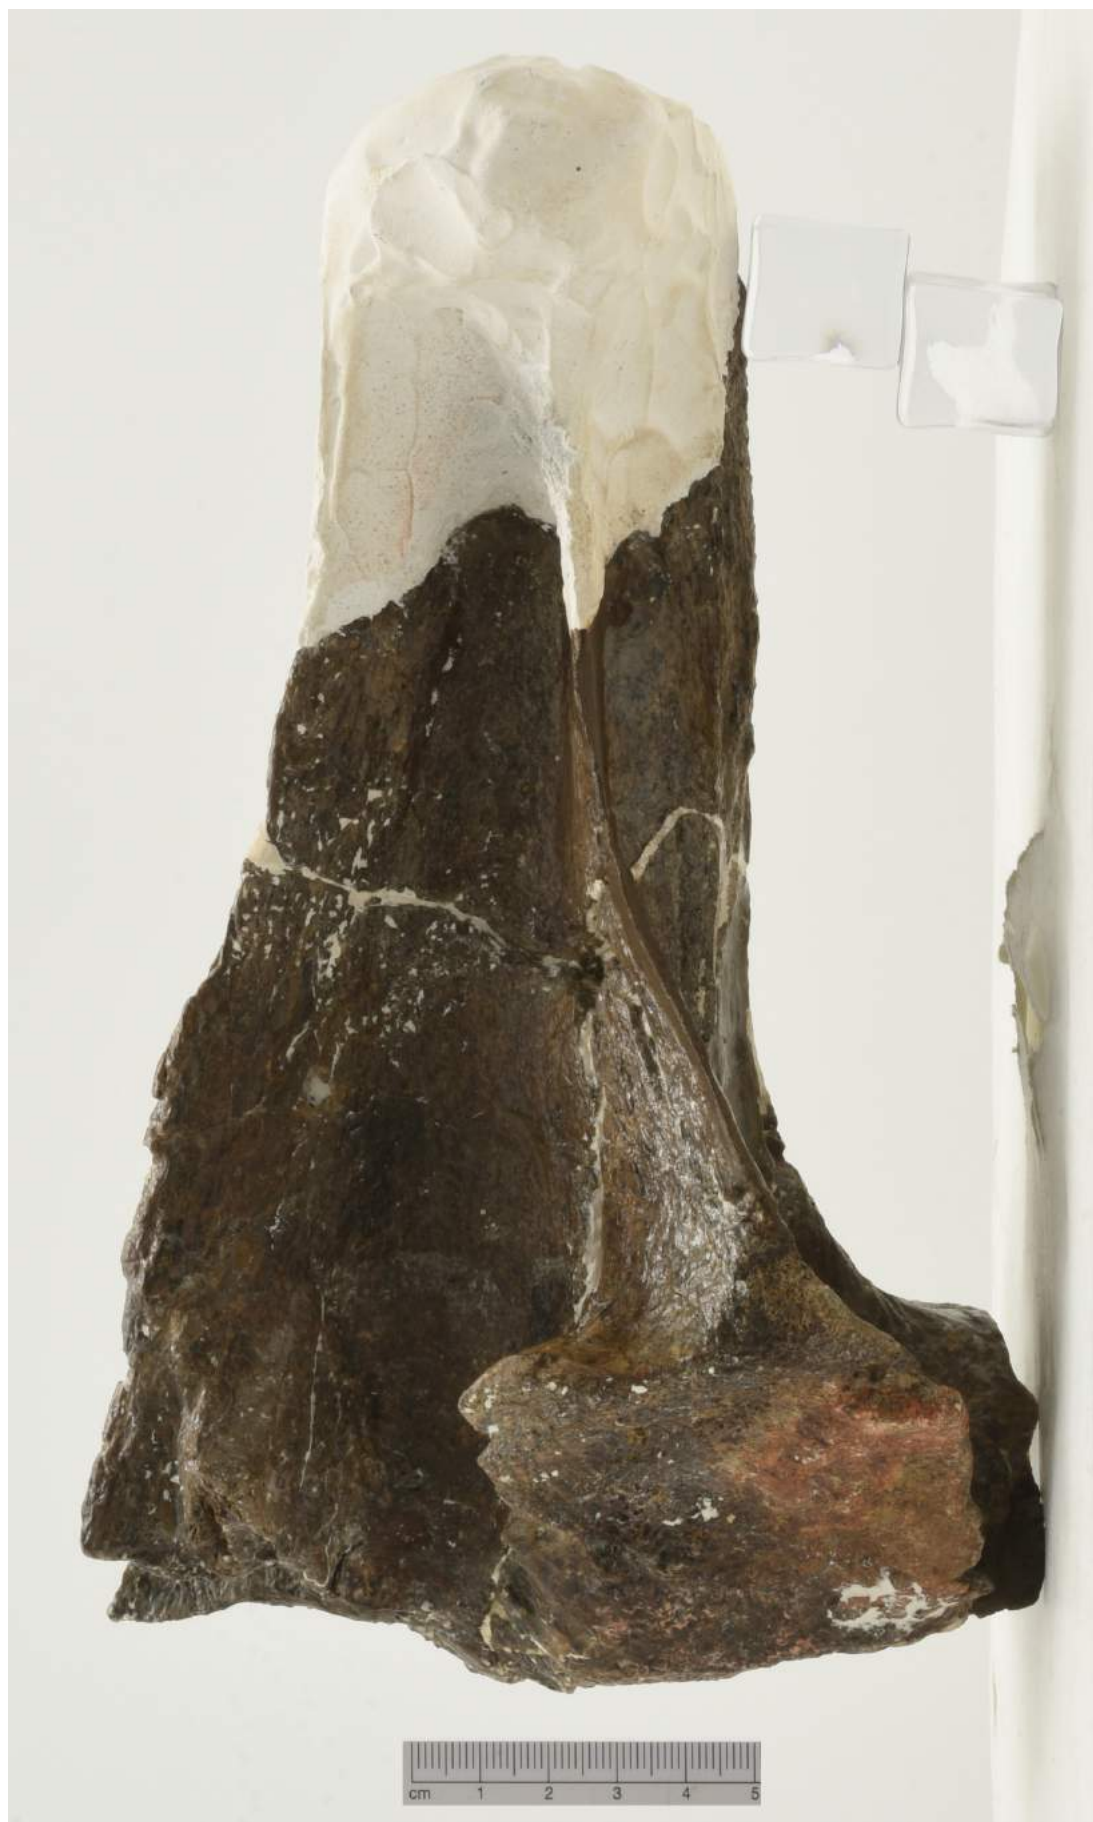



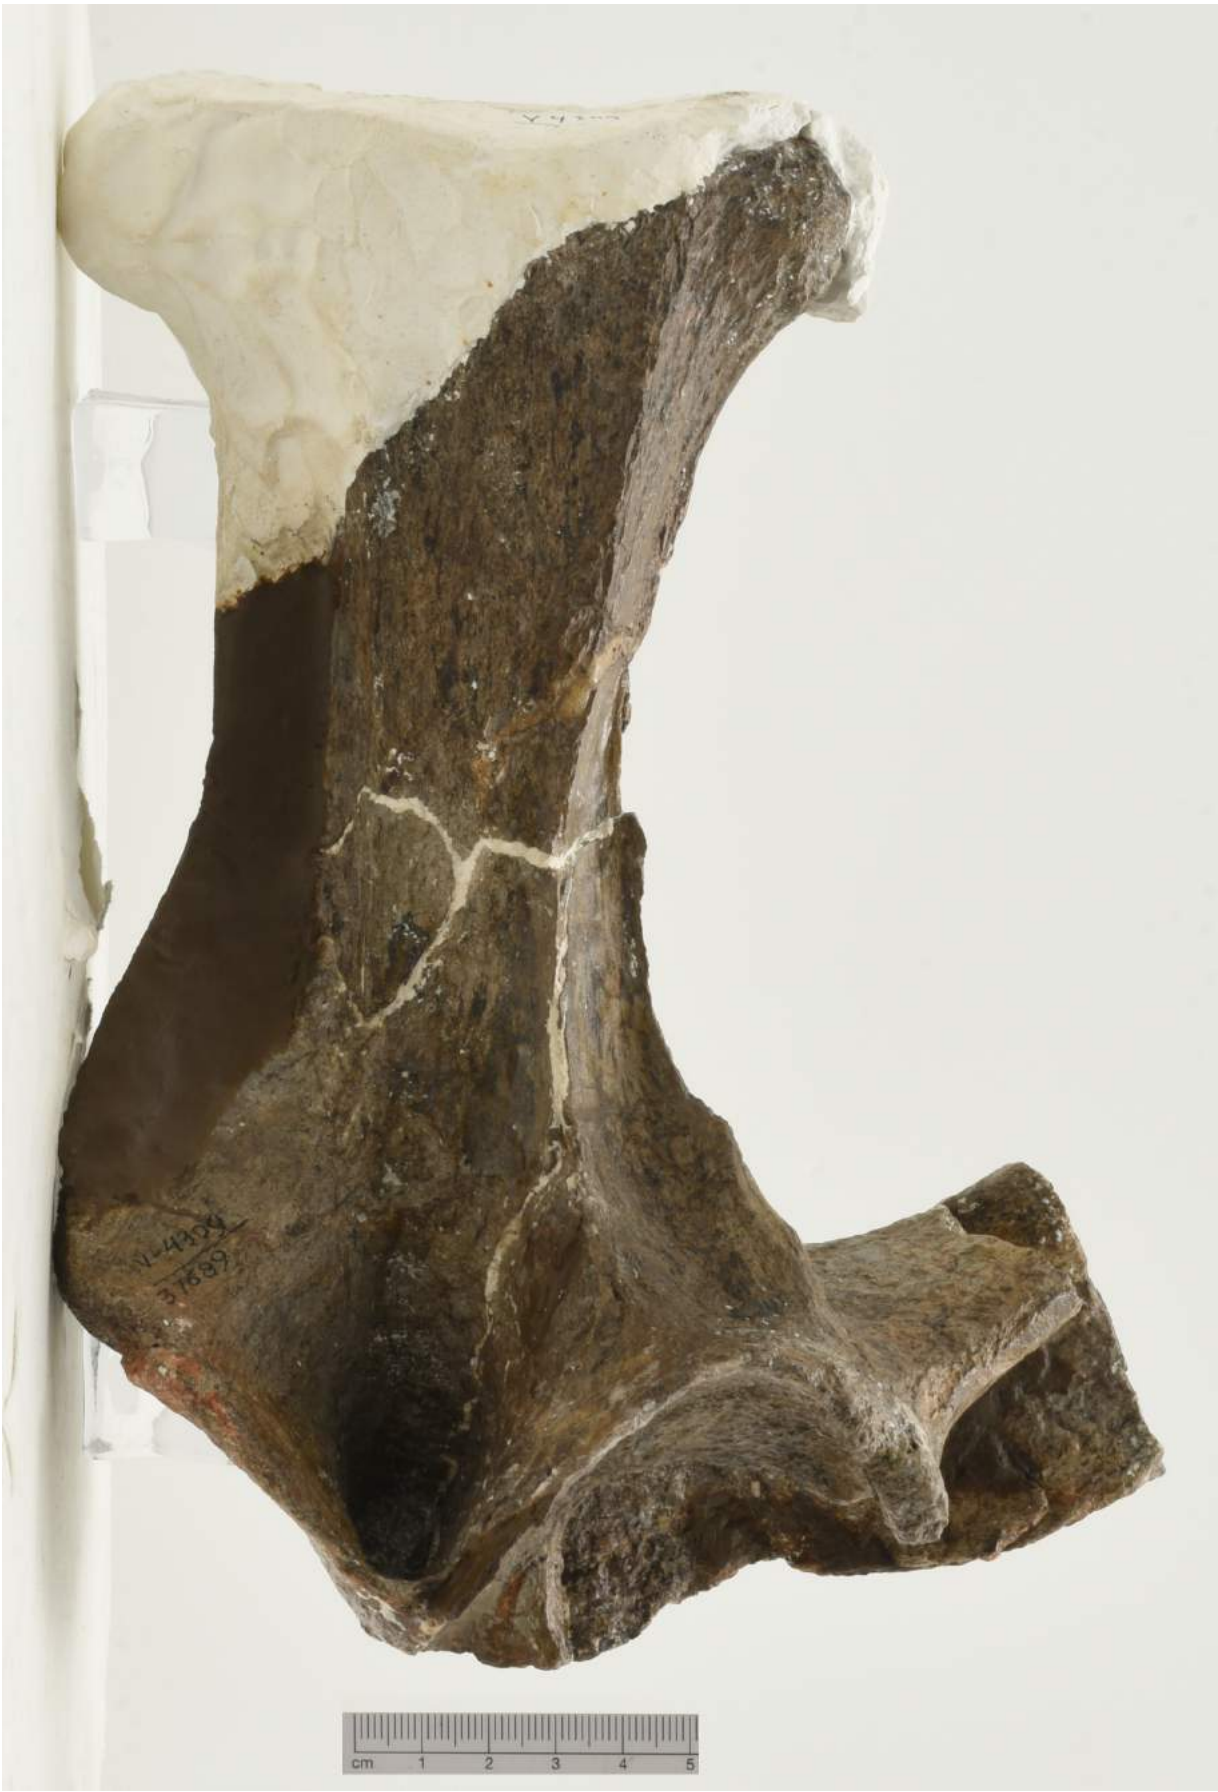

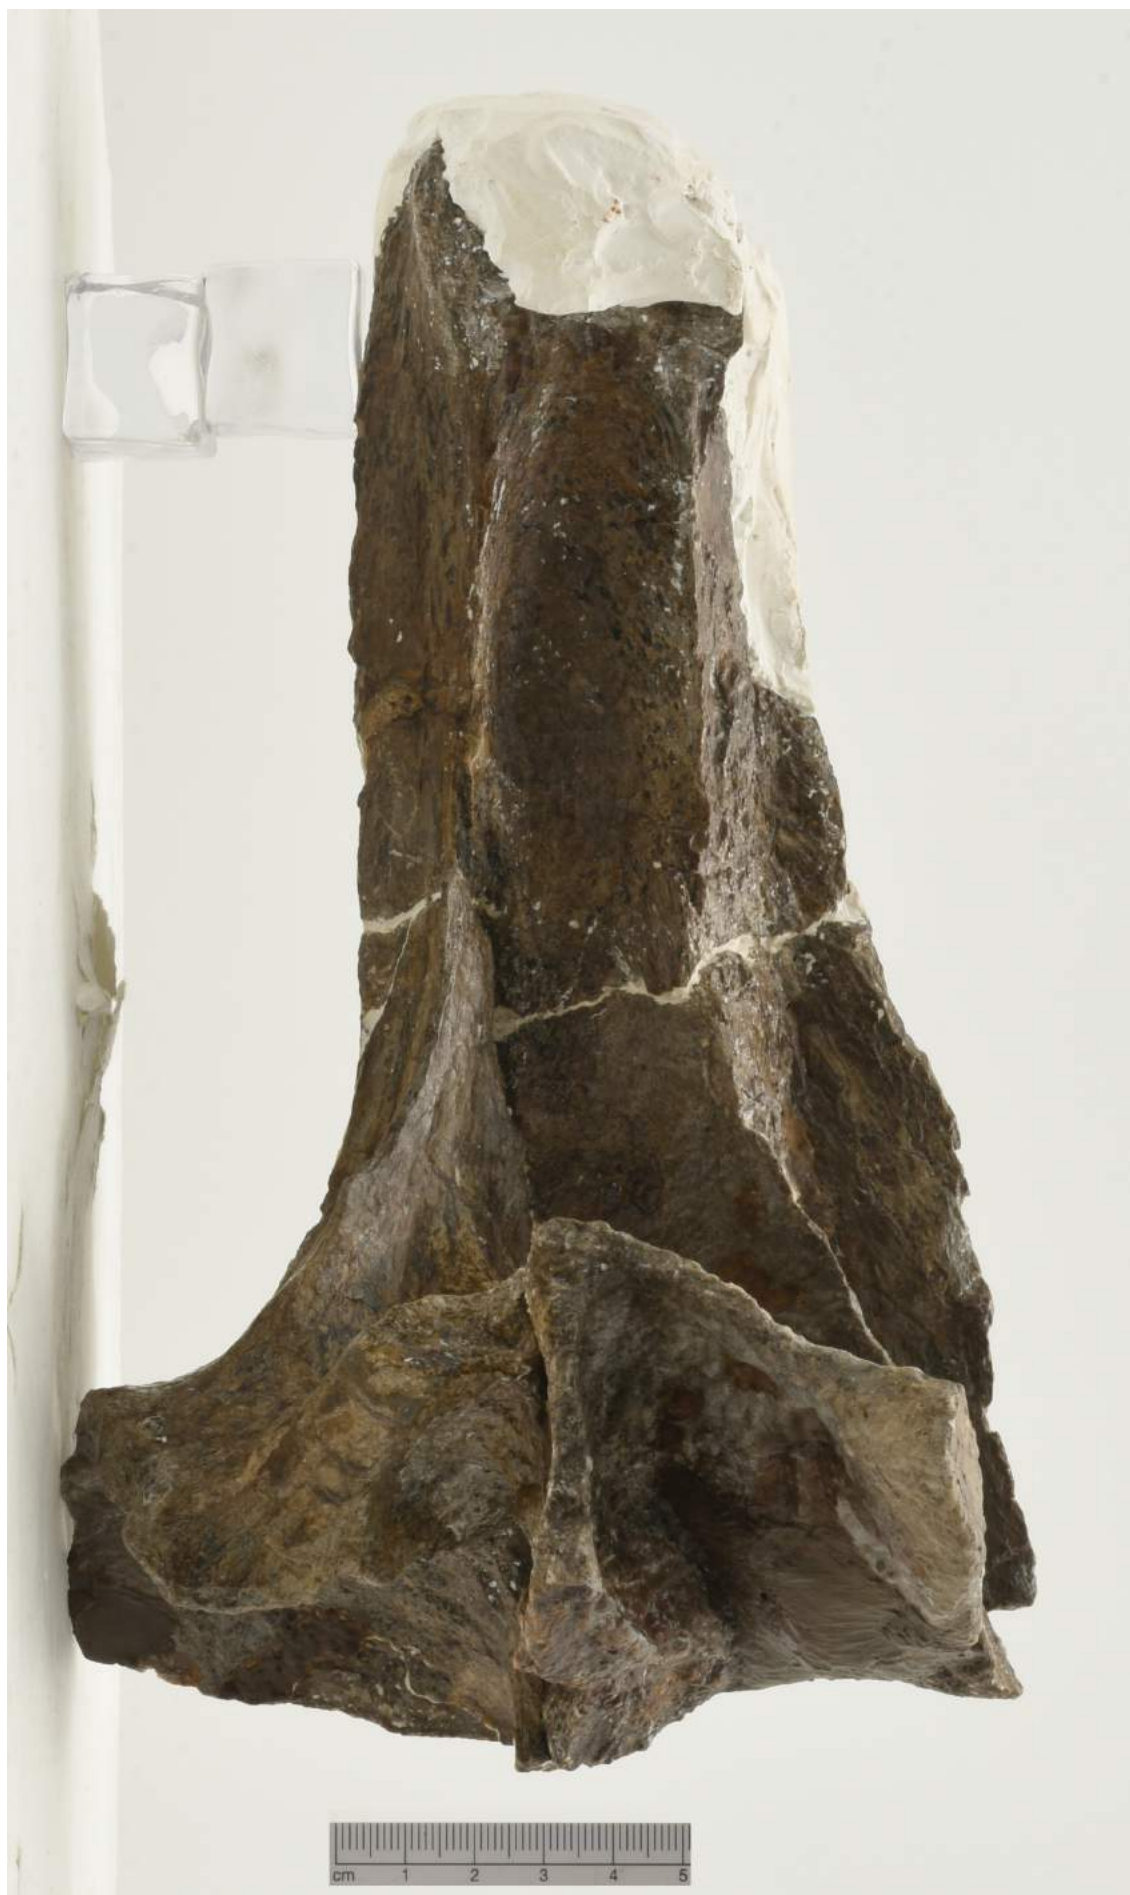

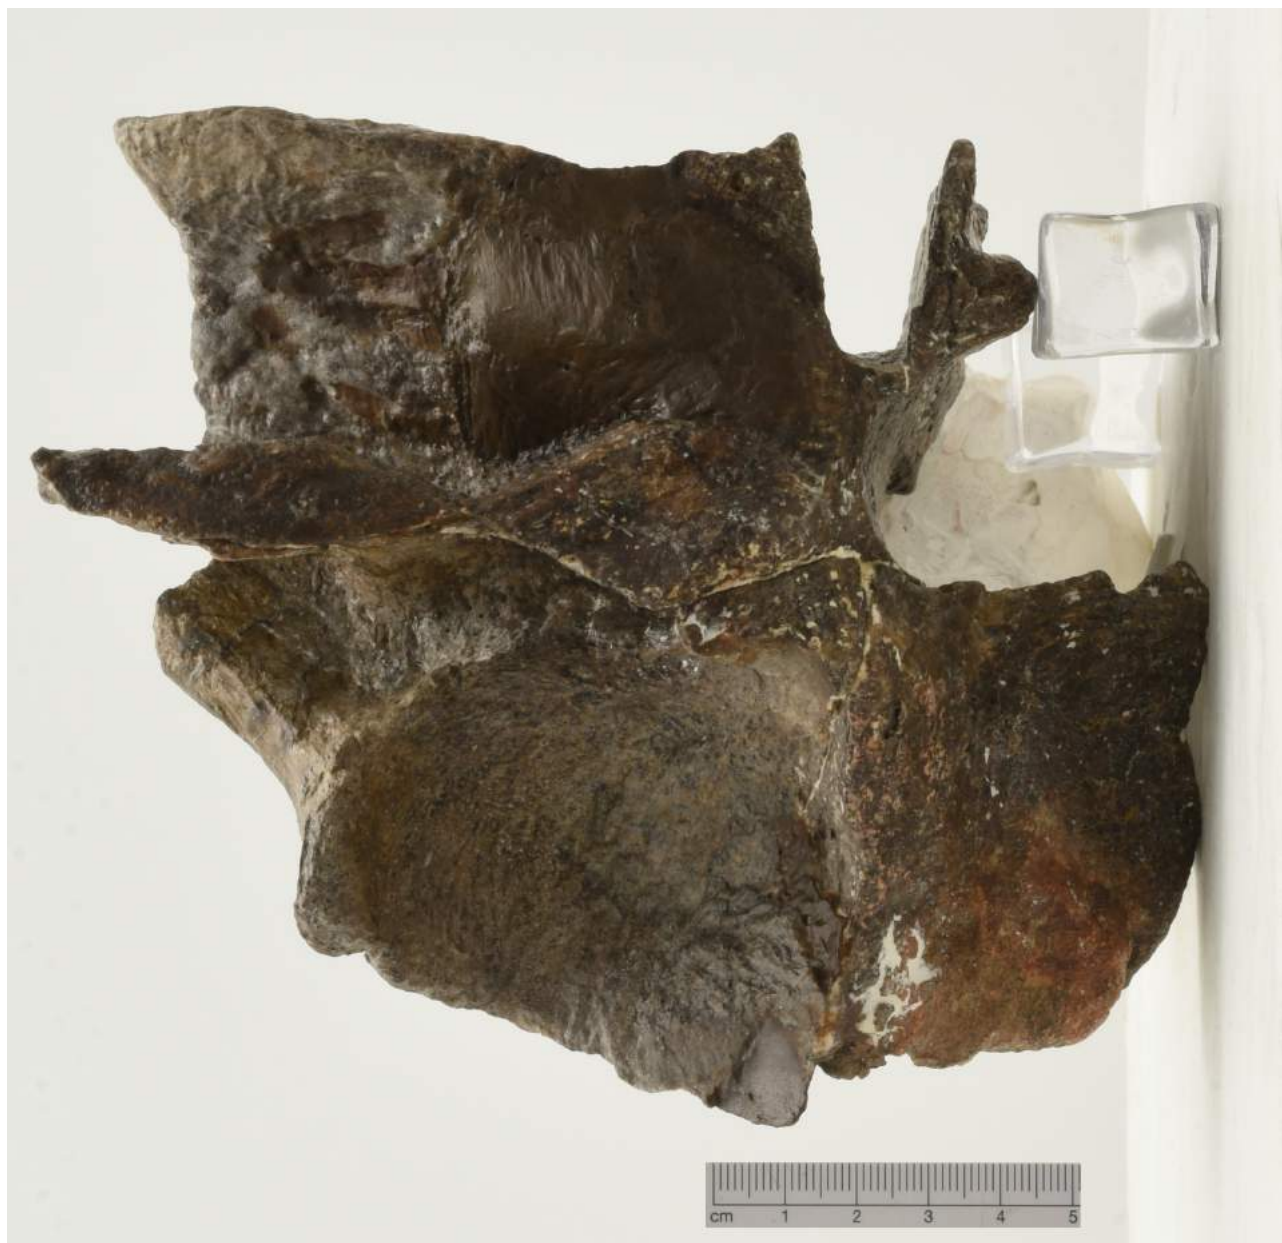



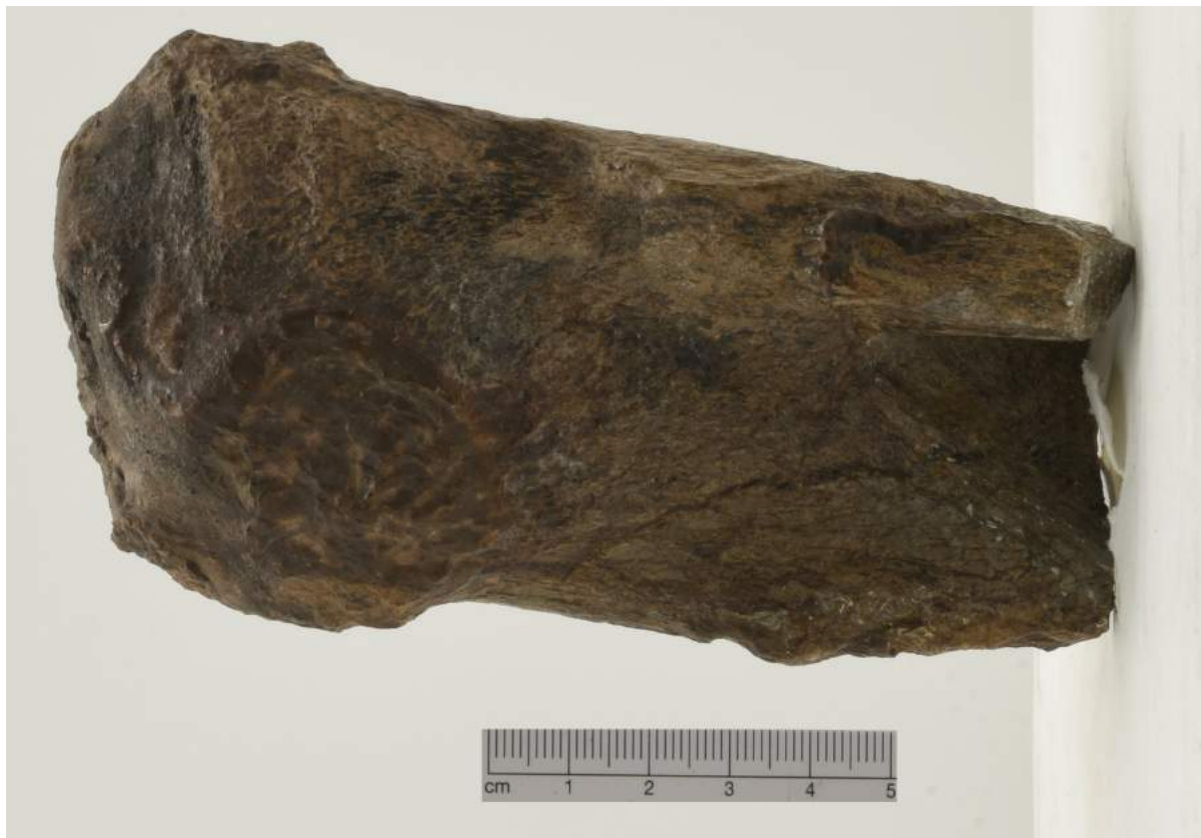

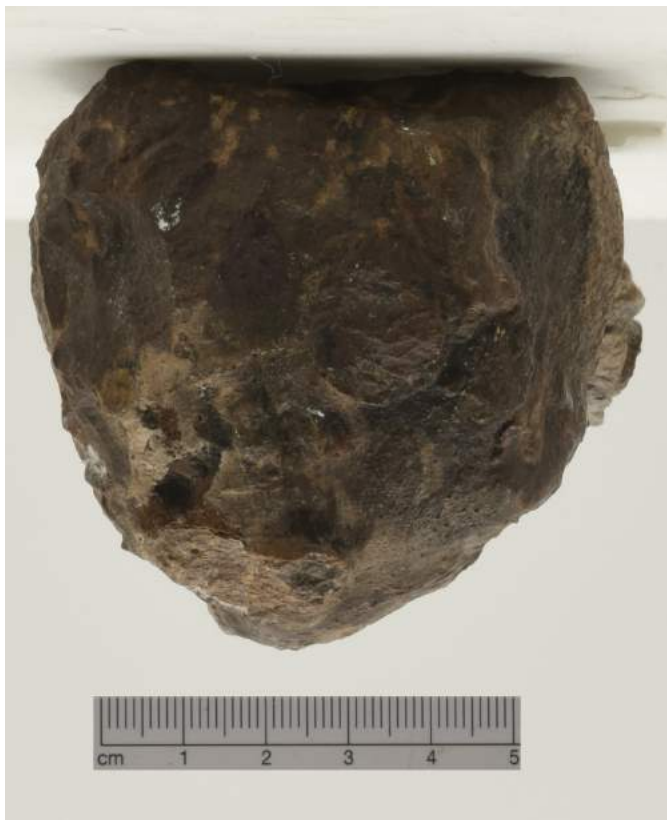

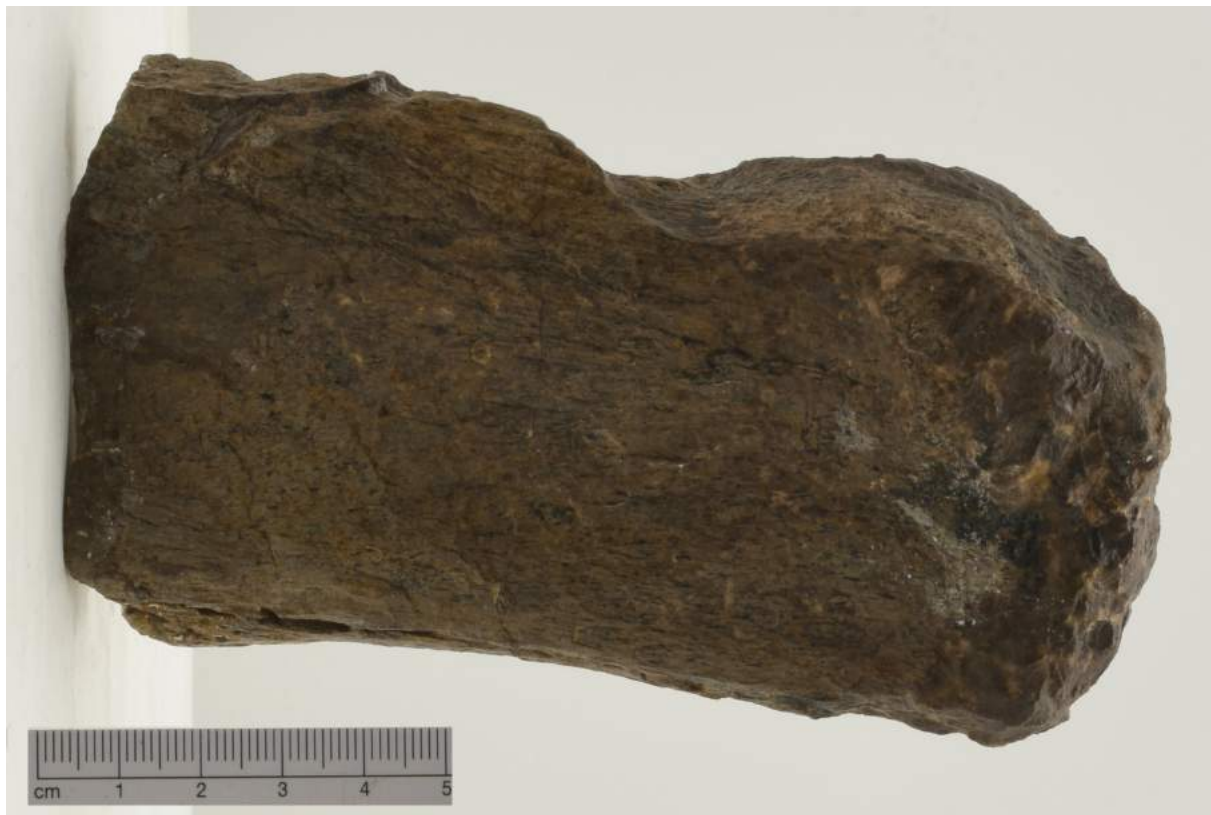

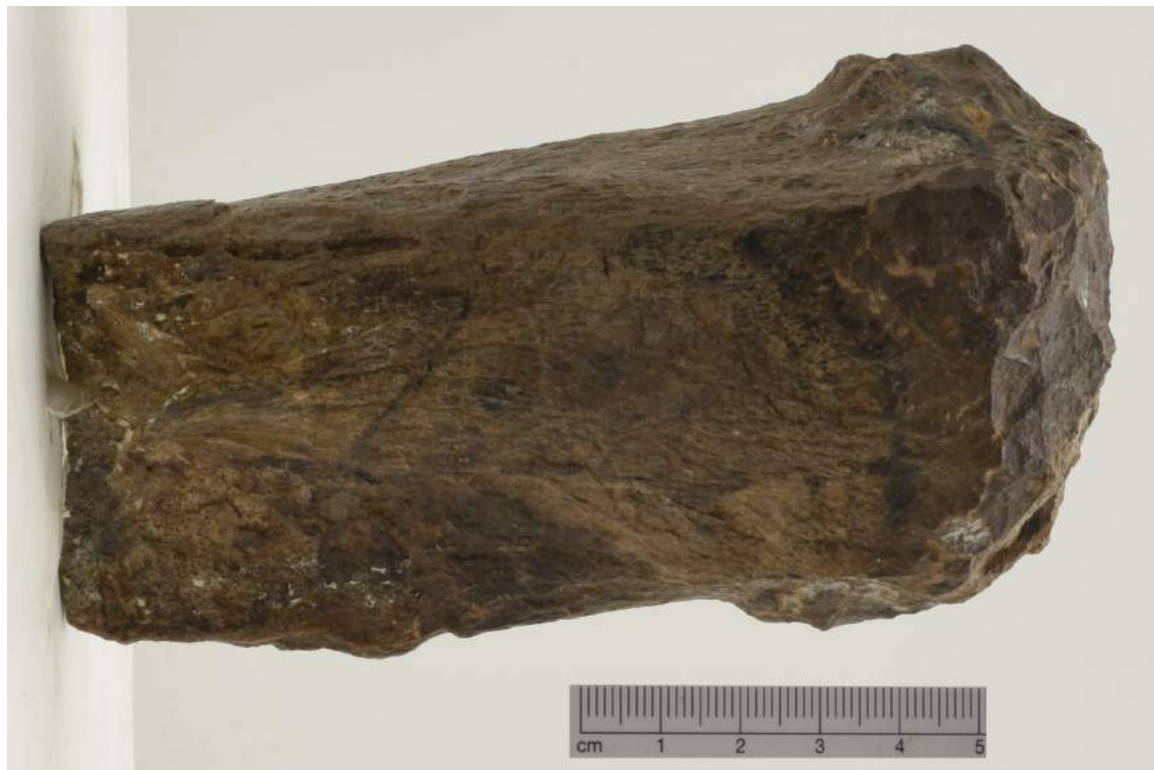



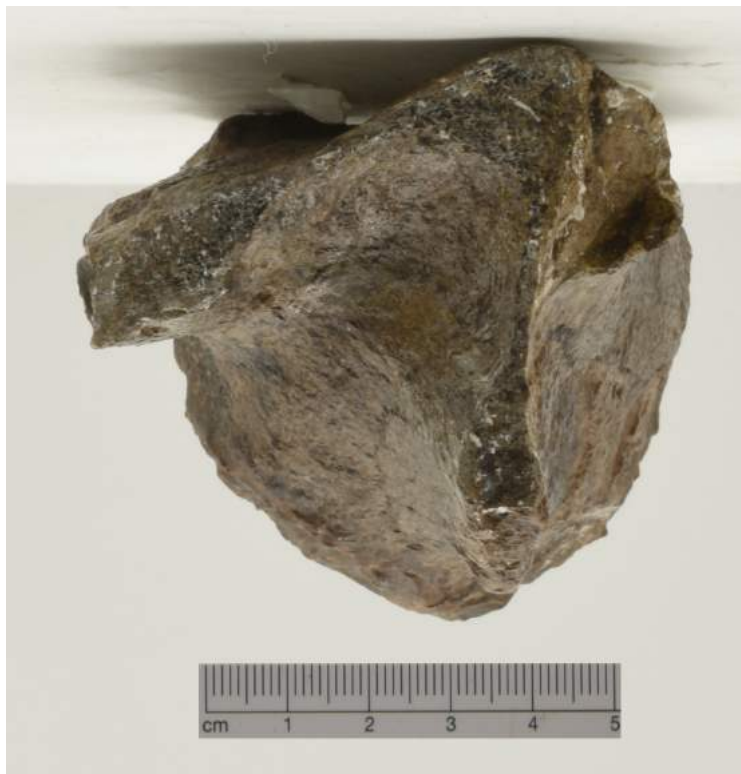

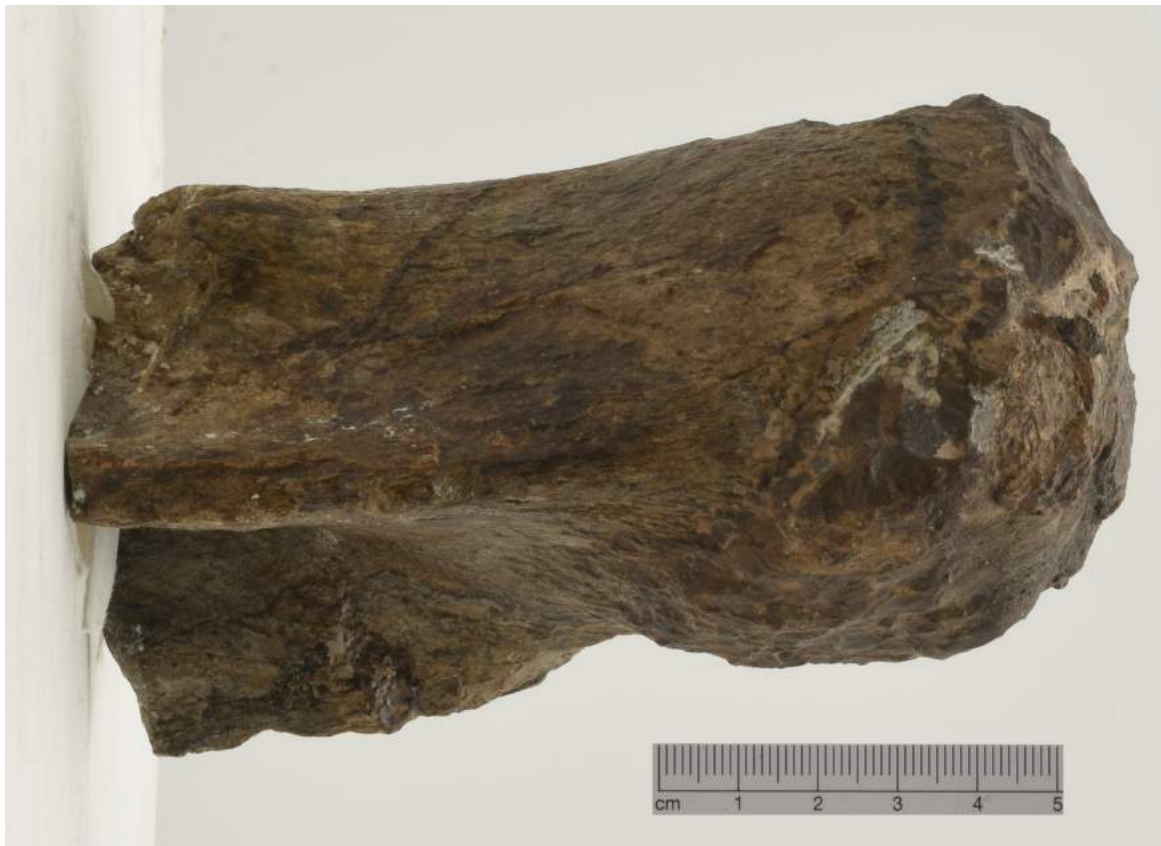

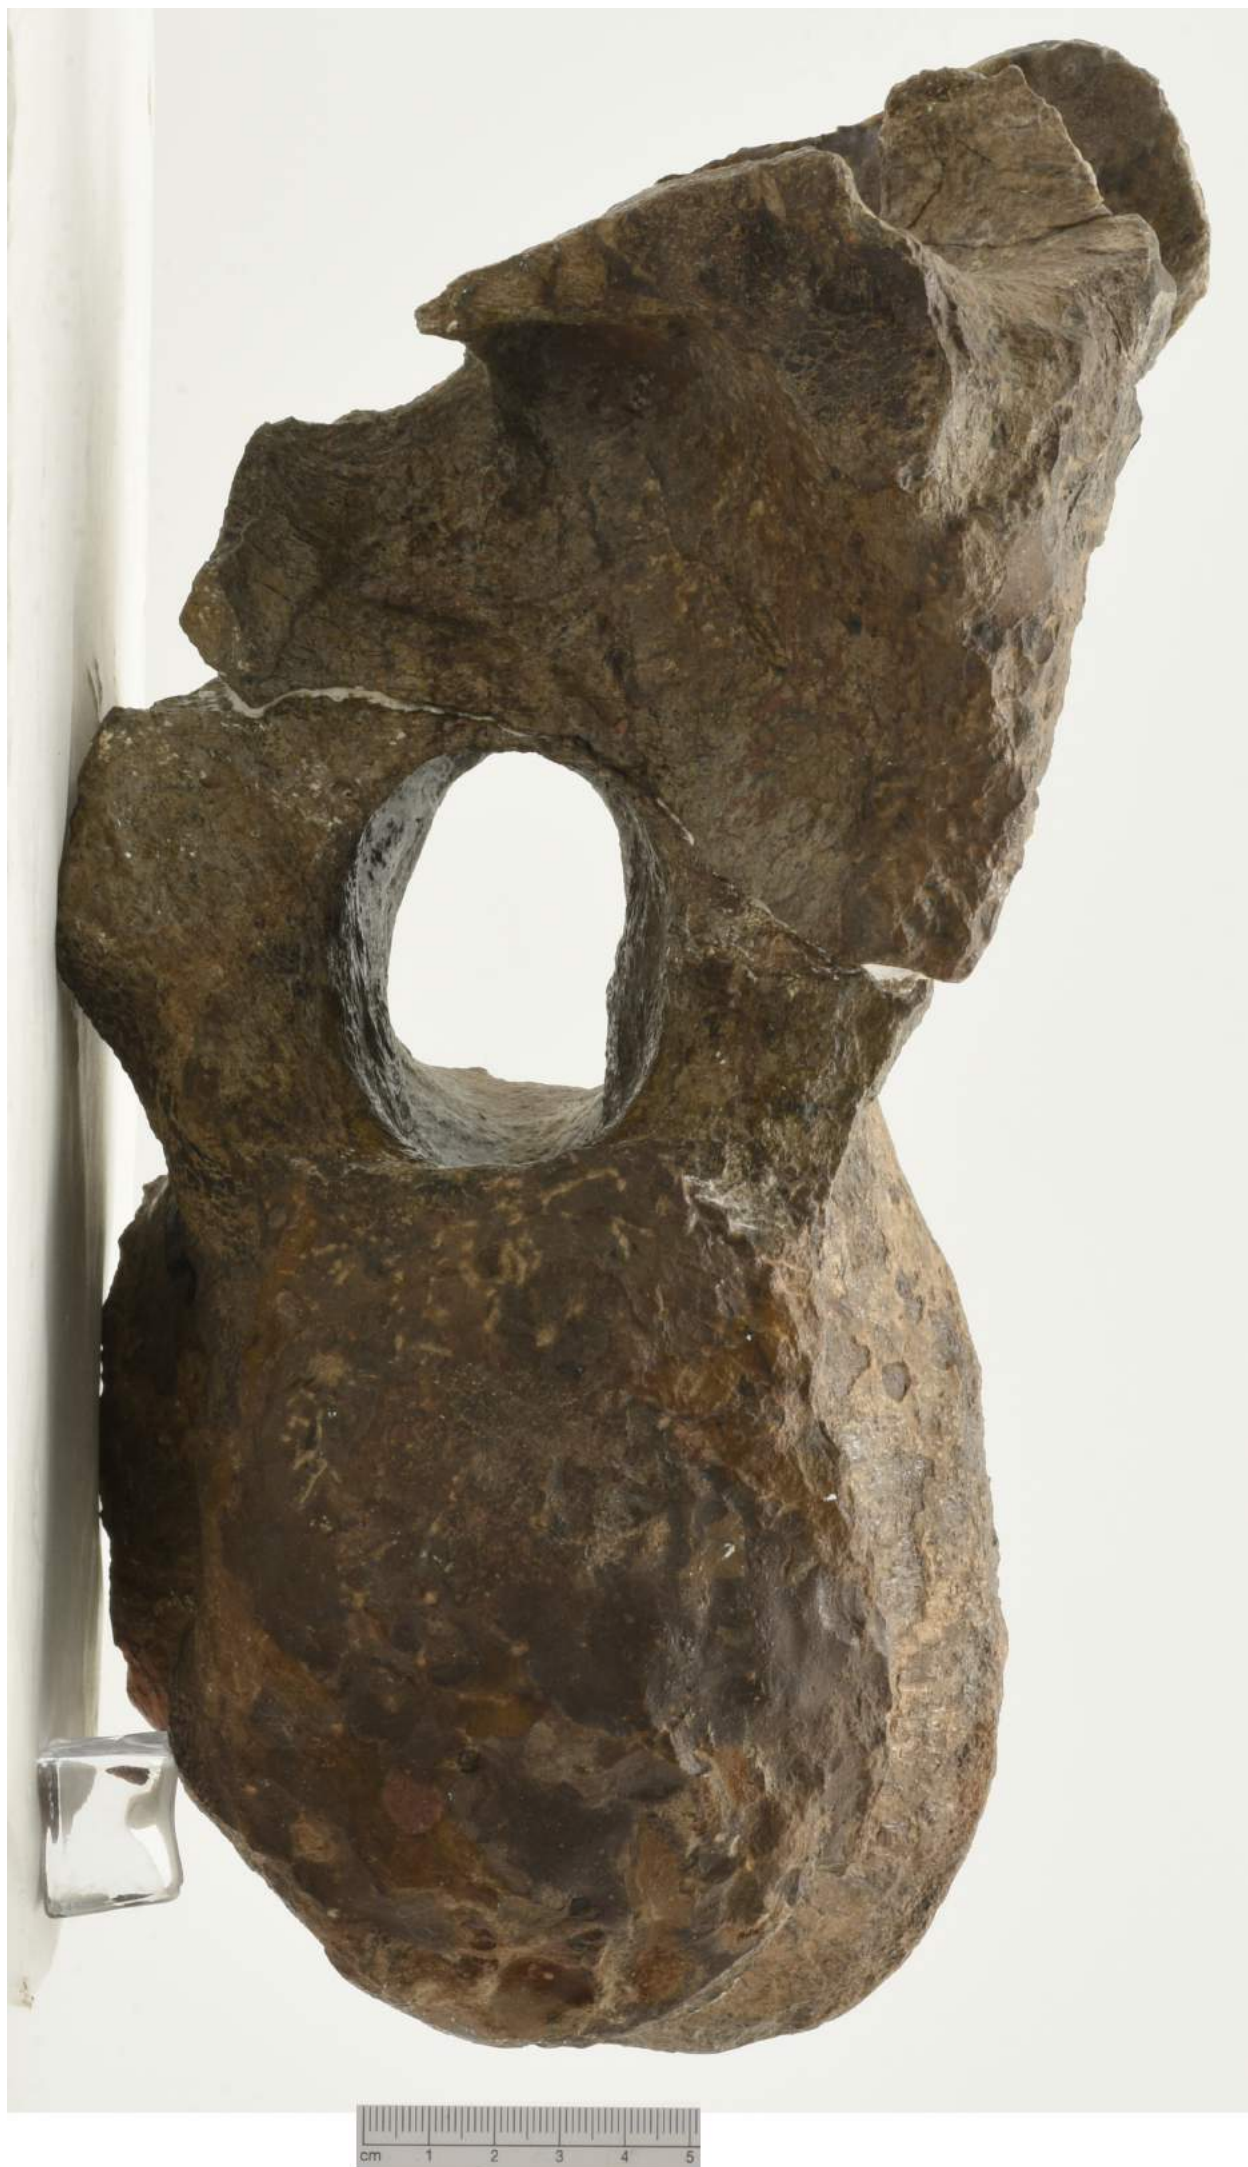

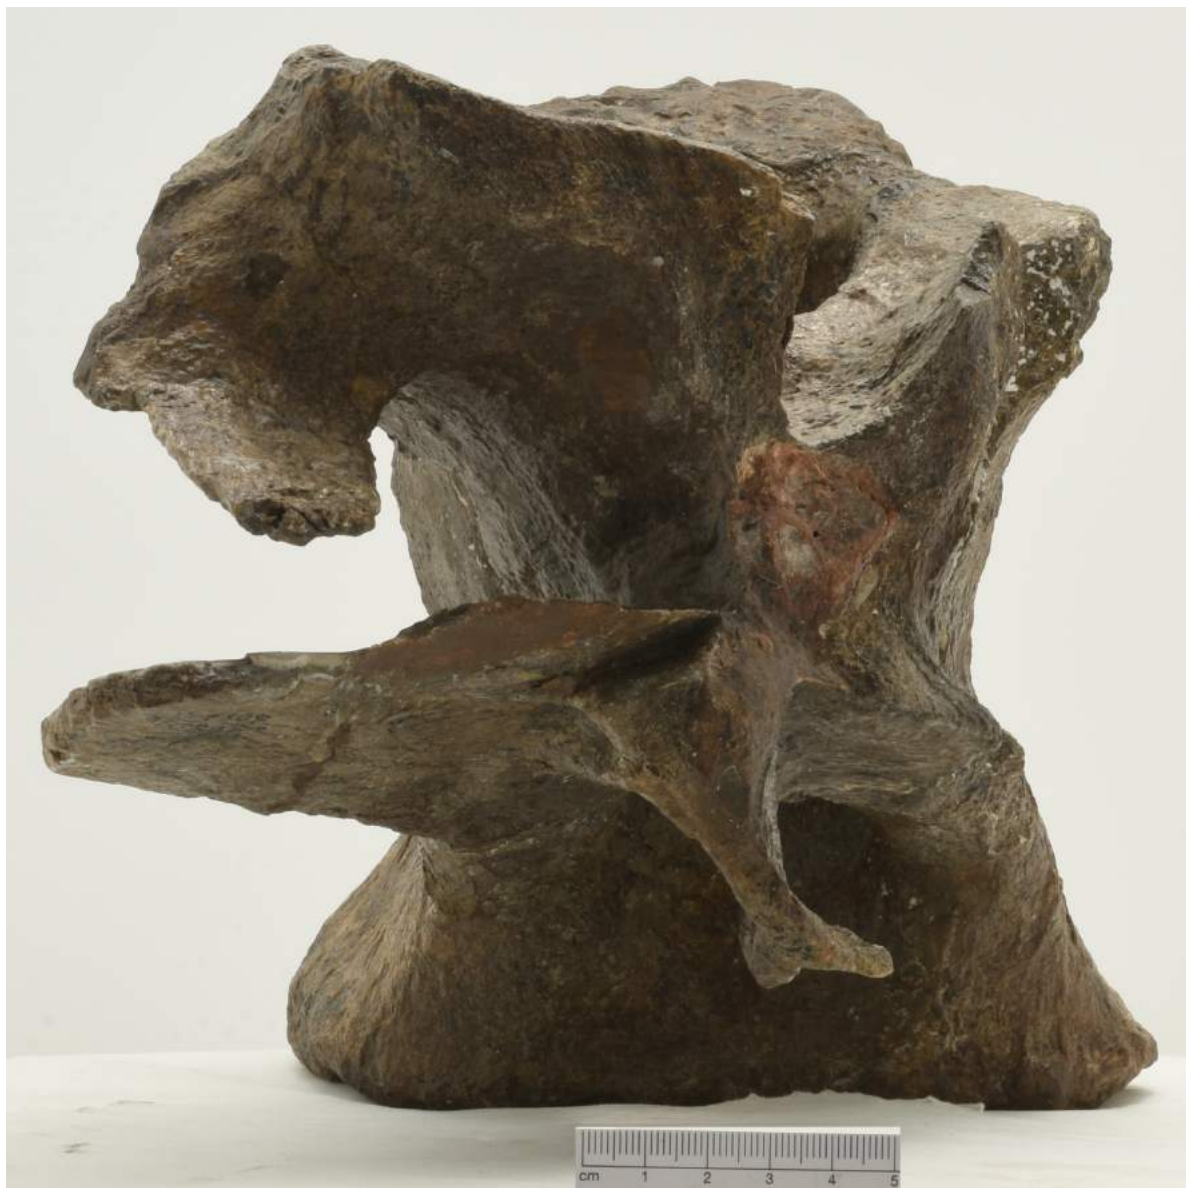



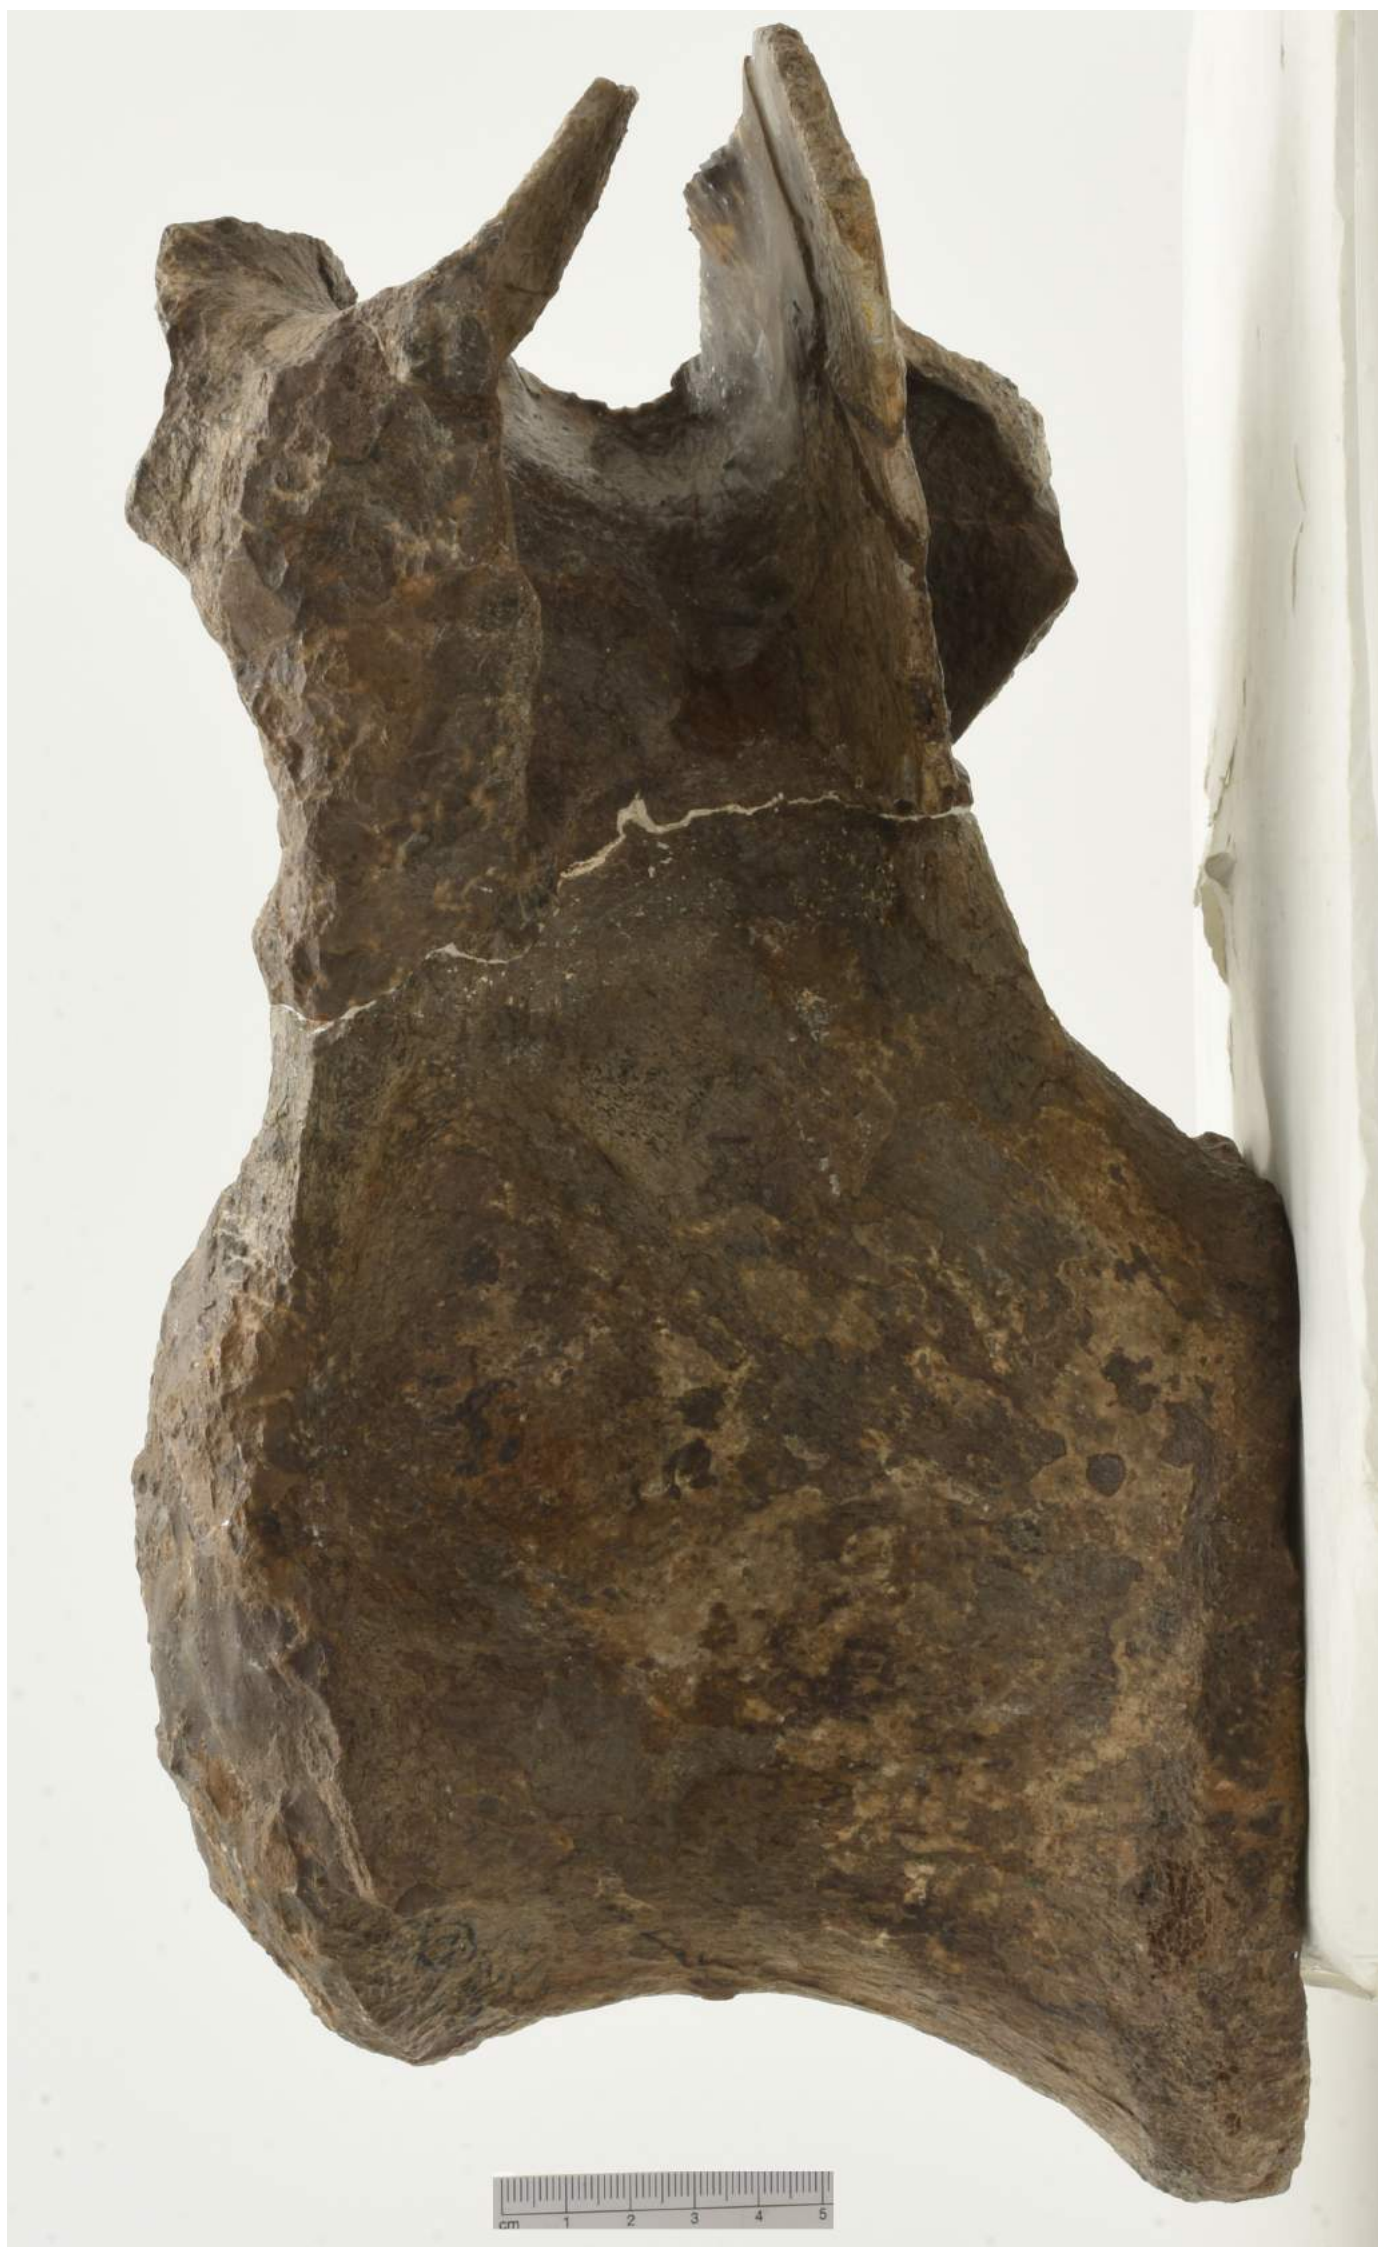

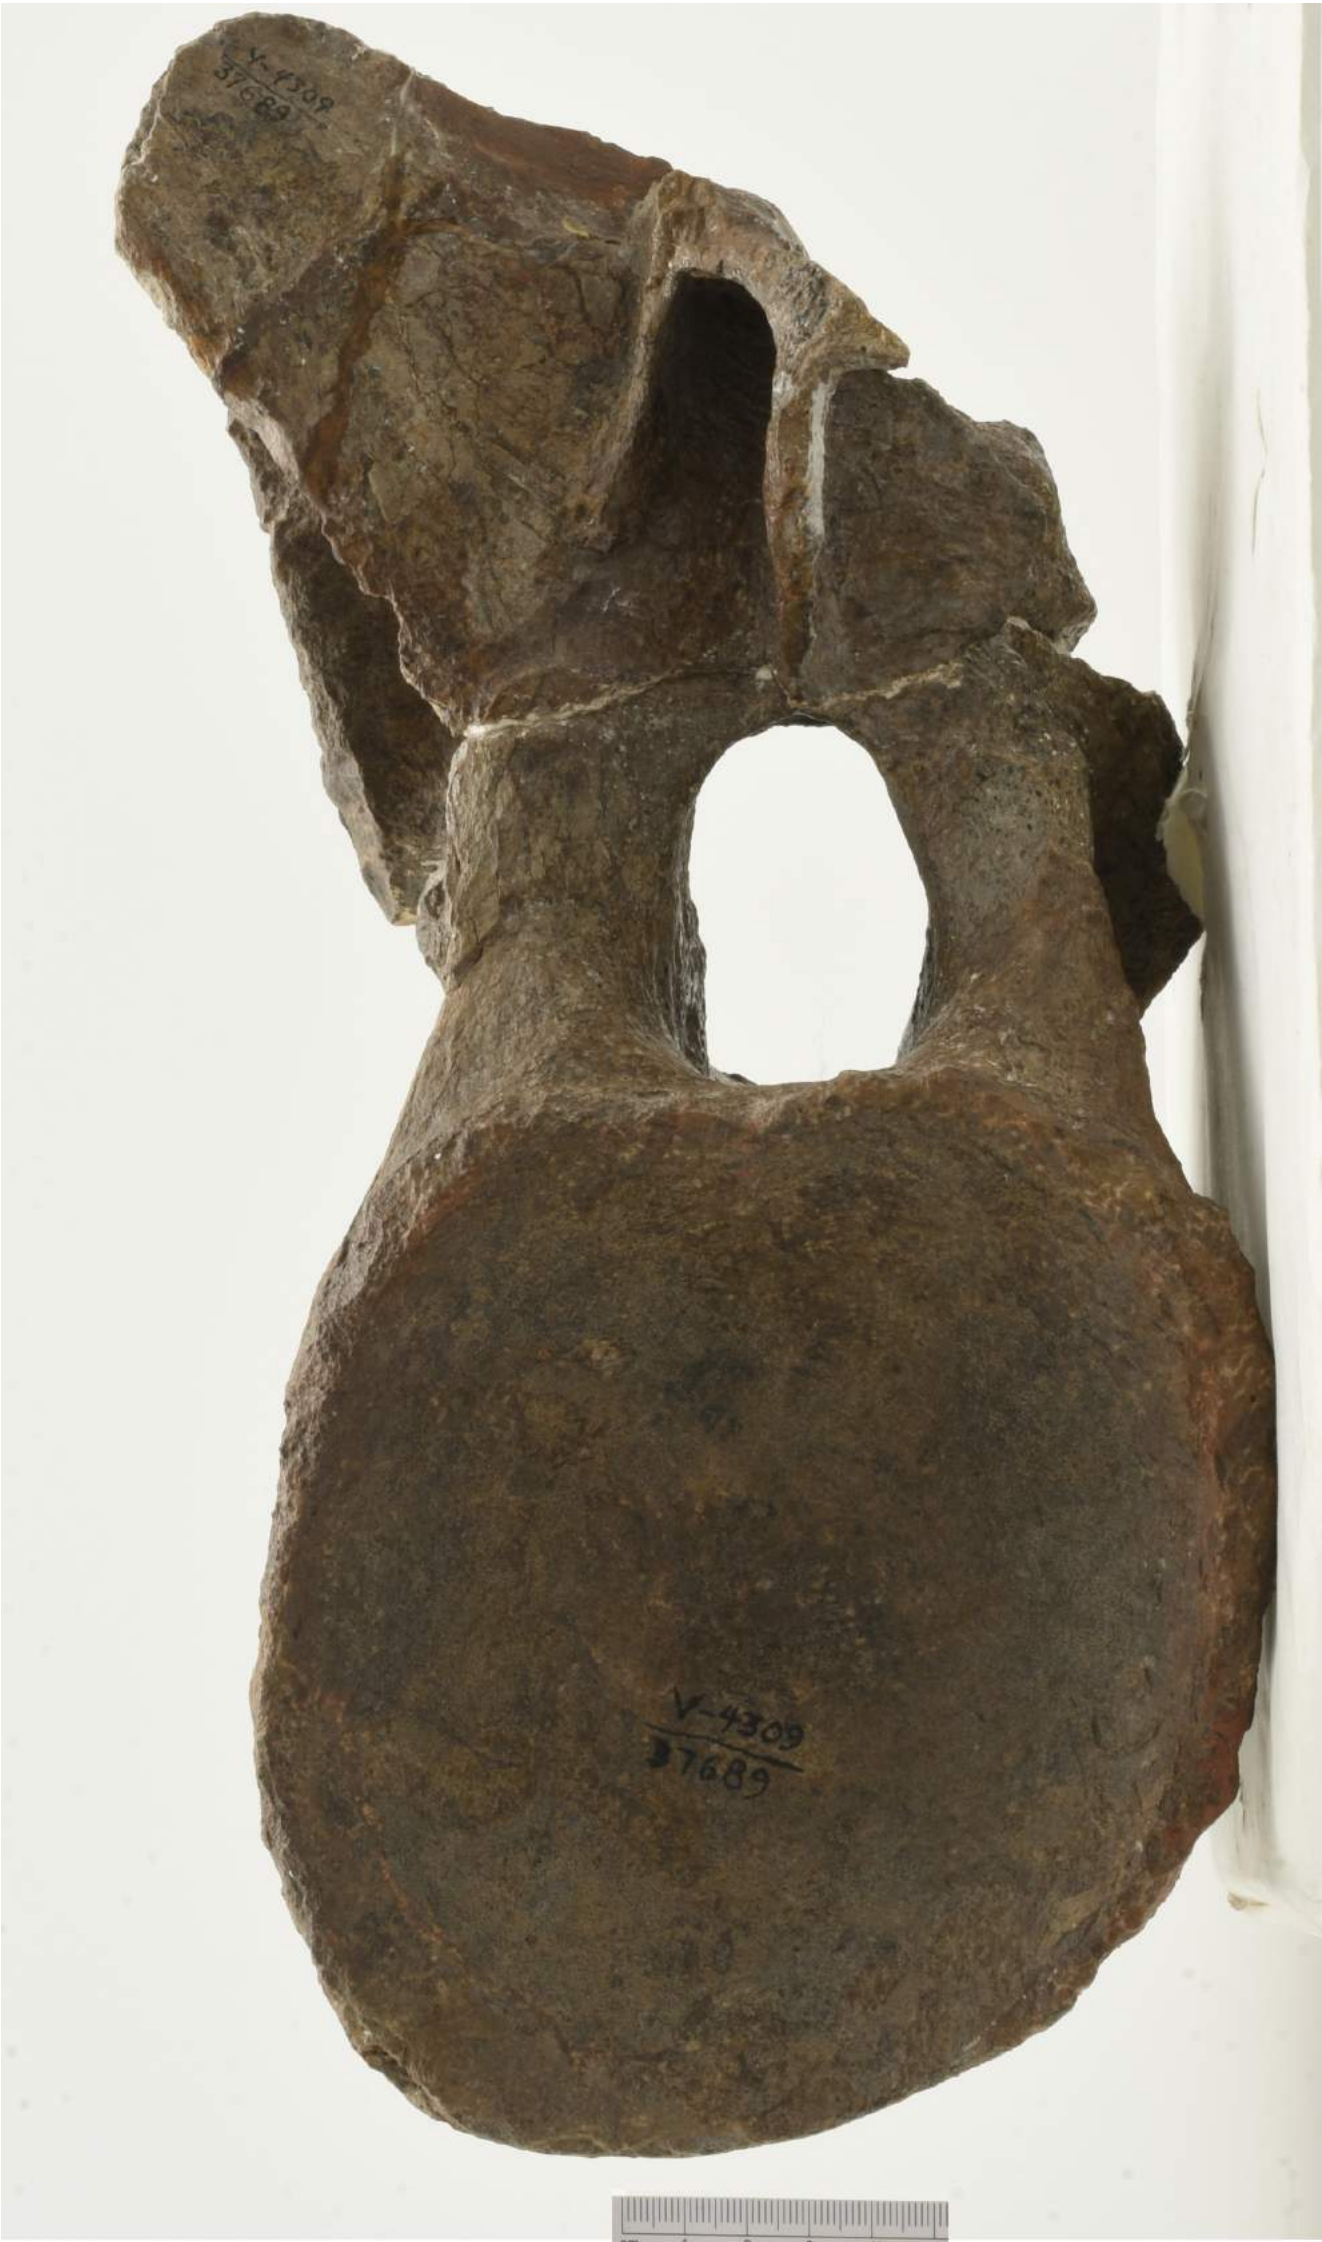



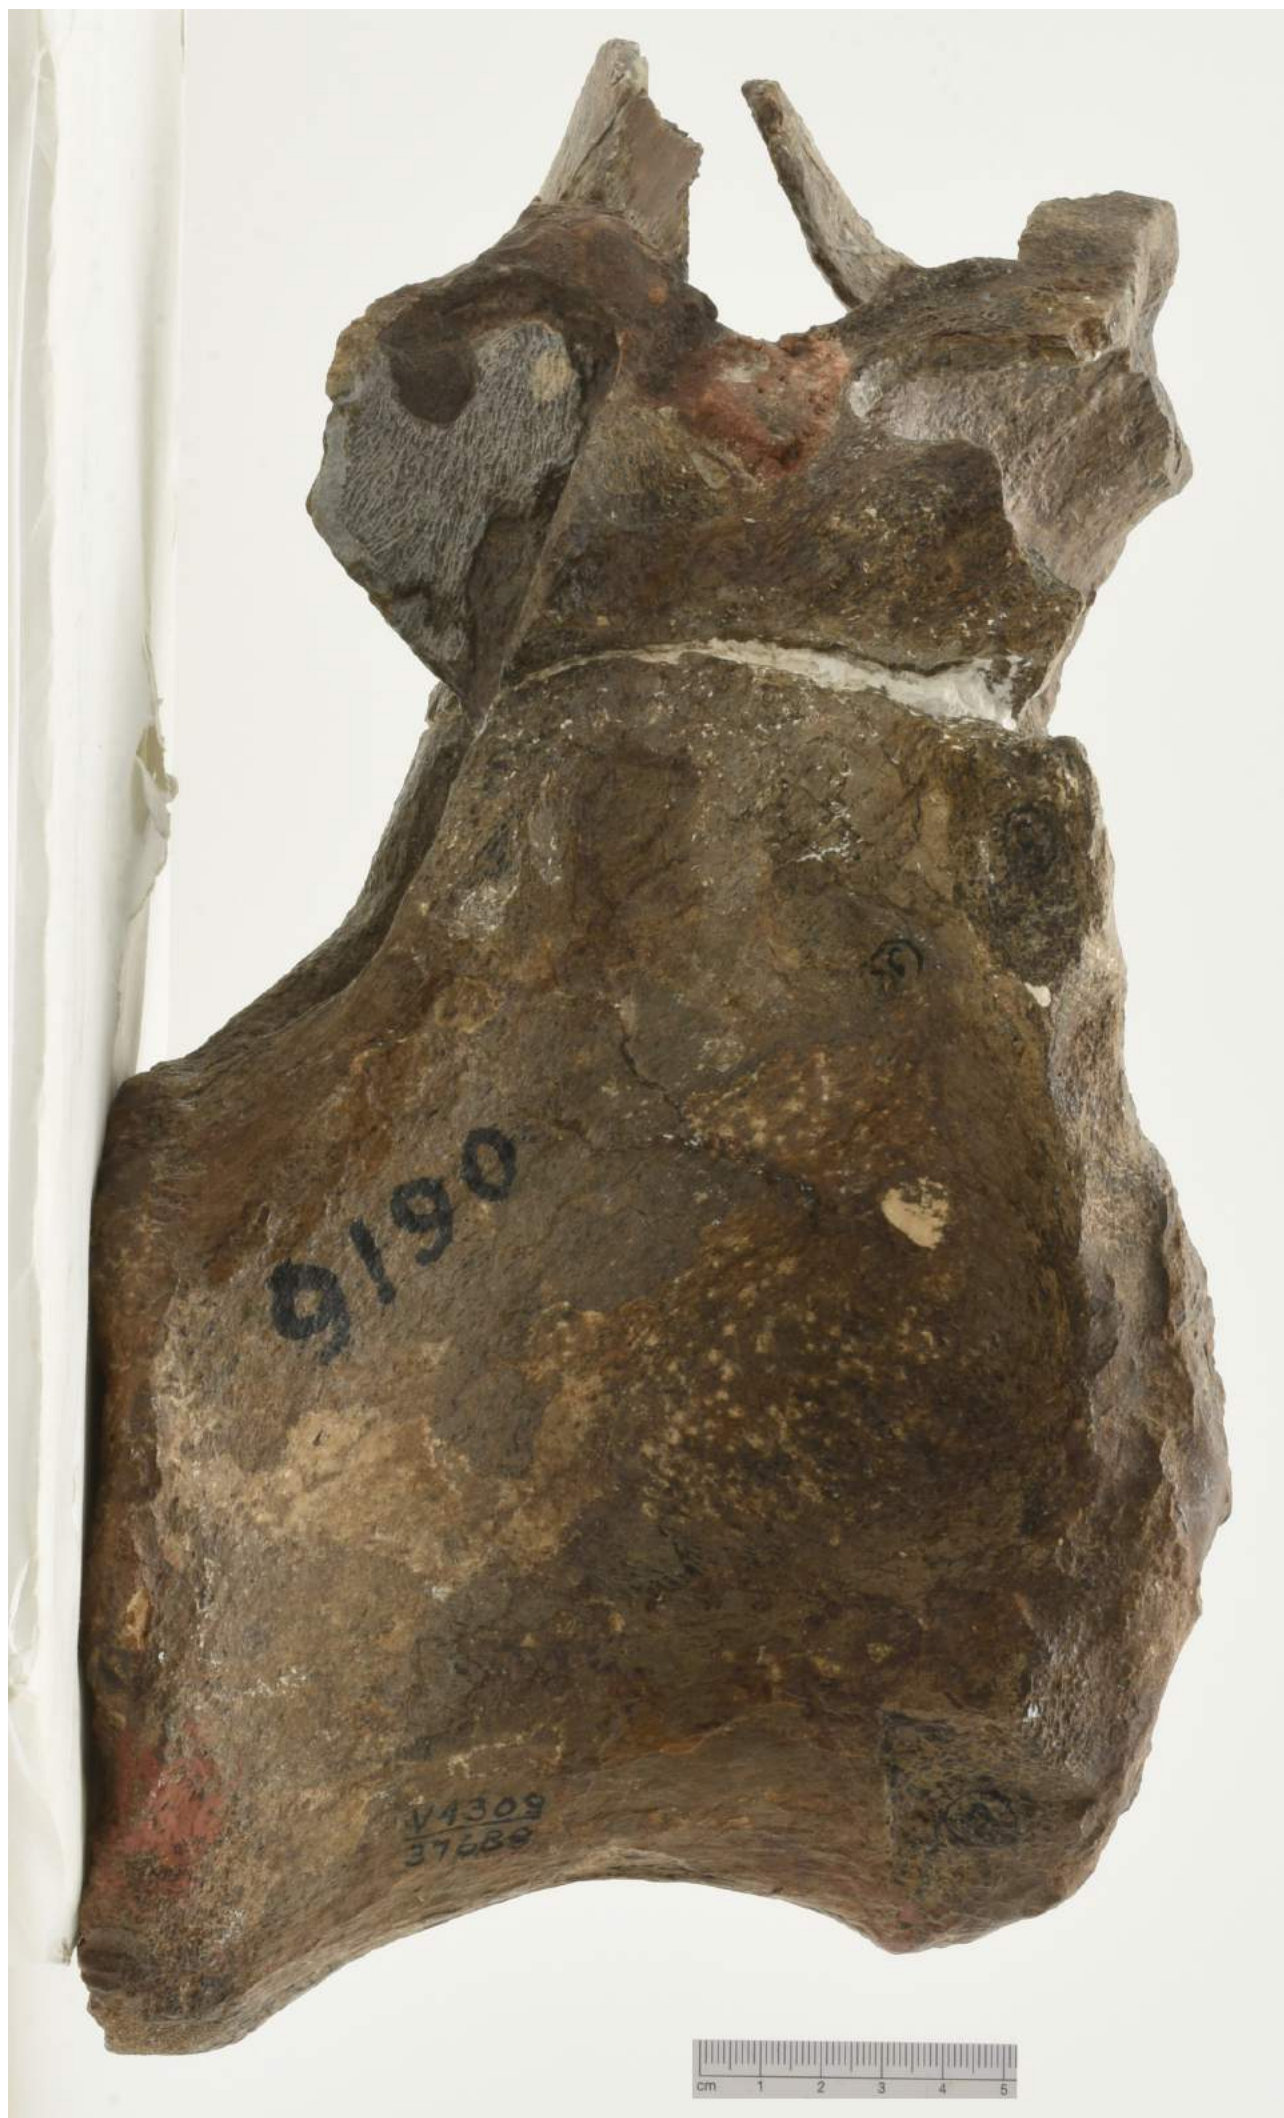

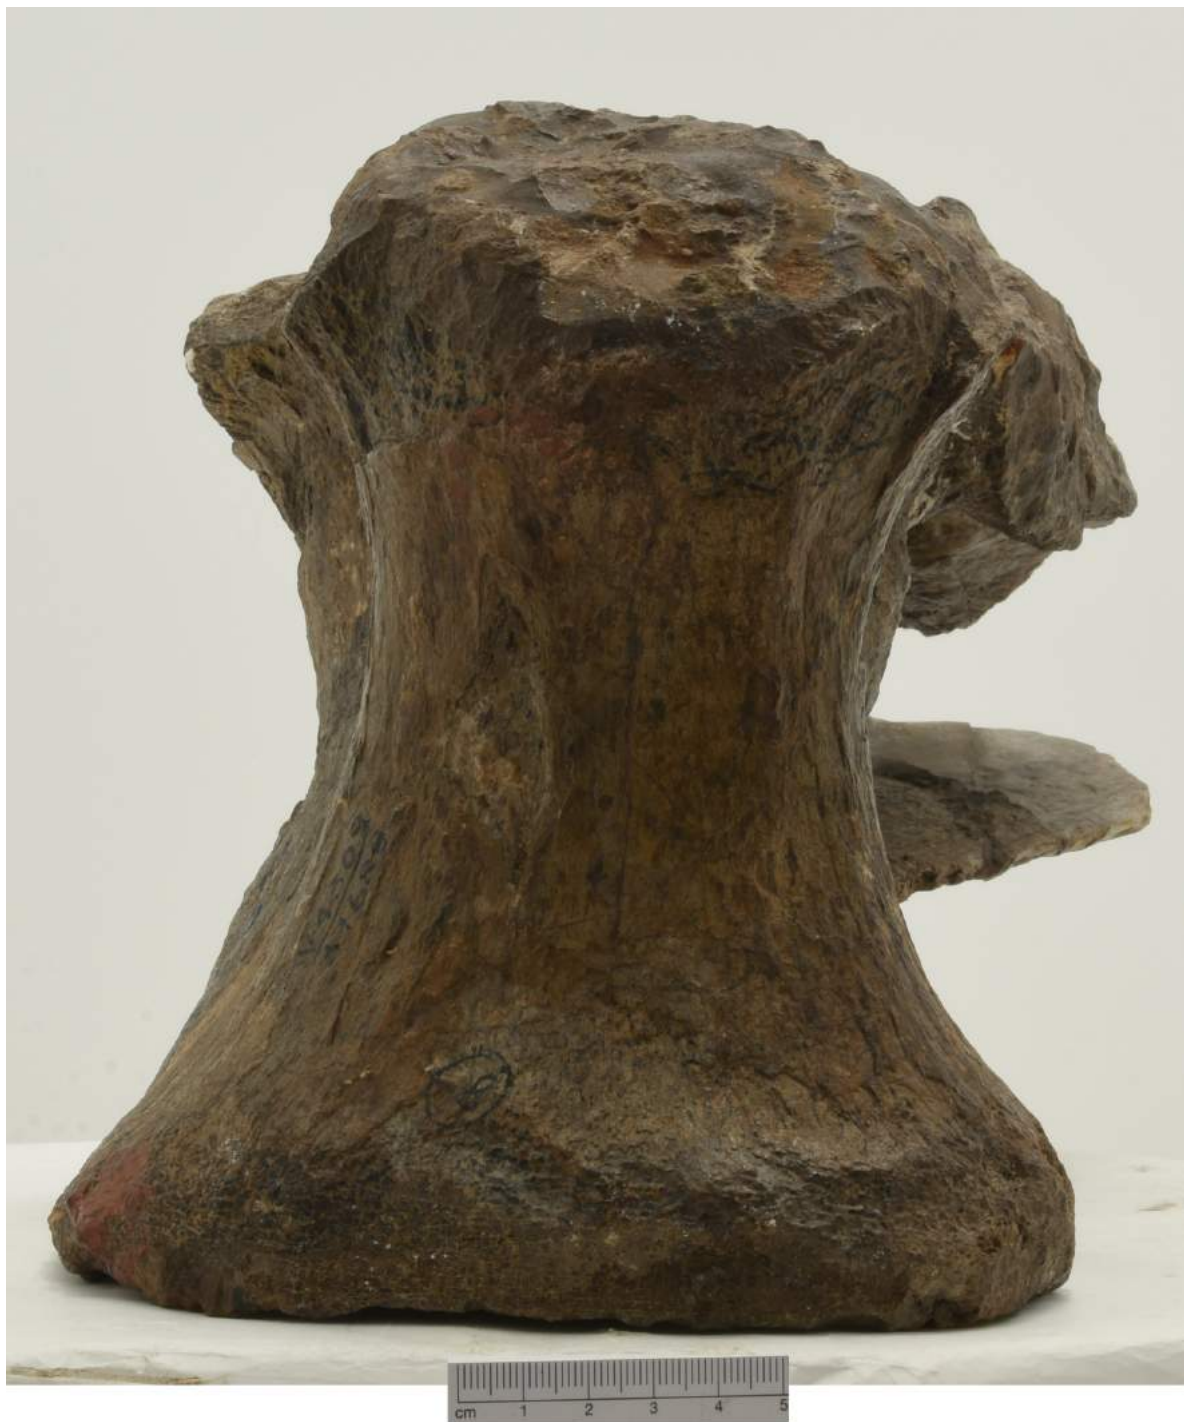

Supplement: Supplementary file 1 [file 2]
